# Supplementary material
Source: PubMed Central journal article supplement (PMC2929600)
Supplement: NIHMS212176-supplement-01.pdf [file NIHMS212176-supplement-01.pdf]

**Table II, online only.** Univariate analysis of patient and surgical factors associated with wound complications

| <i>Patient variables</i>                              | <i>All patients<br/>(n = 1404)<br/>% or mean</i> | <i>No wound<br/>complication<br/>(n = 861)<br/>% or mean</i> | <i>Any wound<br/>complication<br/>(n = 543)<br/>% or mean</i> | <i>Serious wound<br/>complication<br/>(n = 155)<br/>% or mean</i> | <i>Any WC<br/>vs no WC<br/>P value</i> | <i>Serious WC<br/>vs no WC<br/>P value</i> |
|-------------------------------------------------------|--------------------------------------------------|--------------------------------------------------------------|---------------------------------------------------------------|-------------------------------------------------------------------|----------------------------------------|--------------------------------------------|
| Gender                                                |                                                  |                                                              |                                                               |                                                                   |                                        |                                            |
| Male                                                  | 897 (64%)                                        | 575 (67%)                                                    | 322 (59%)                                                     | 82 (53%)                                                          | —                                      | —                                          |
| Female                                                | 507 (36%)                                        | 286 (33%)                                                    | 221 (41%)                                                     | 73 (47%)                                                          | .0052                                  | .0013                                      |
| Race                                                  |                                                  |                                                              |                                                               |                                                                   | .8528                                  | .8404                                      |
| Caucasian                                             | 1017 (72%)                                       | 627 (73%)                                                    | 390 (72%)                                                     | 108 (70%)                                                         | —                                      | —                                          |
| Black                                                 | 249 (18%)                                        | 150 (17%)                                                    | 99 (18%)                                                      | 29 (19%)                                                          | —                                      | —                                          |
| Hispanic                                              | 107 (8%)                                         | 63 (7%)                                                      | 44 (8%)                                                       | 15 (10%)                                                          | —                                      | —                                          |
| Age (y)                                               | 68.5 ± 11.5                                      | 68.2 ± 11.5                                                  | 68.9 ± 11.6                                                   | 67.8 ± 11.9                                                       | .3235                                  | .6714                                      |
| Weight (kgs)                                          |                                                  |                                                              |                                                               |                                                                   | .8352                                  | .0814                                      |
| Study drug                                            | 707 (50%)                                        | 447 (52%)                                                    | 260 (48%)                                                     | 68 (44%)                                                          | .1542                                  | .0674                                      |
| Smoker                                                | 1033 (74%)                                       | 636 (74%)                                                    | 397 (73%)                                                     | 112 (72%)                                                         | .7555                                  | .6916                                      |
| Dialysis-dependant                                    | 170 (12%)                                        | 96 (11%)                                                     | 74 (14%)                                                      | 16 (10%)                                                          | .1795                                  | .8893                                      |
| Hypertension                                          | 1146 (82%)                                       | 696 (81%)                                                    | 450 (83%)                                                     | 134 (86%)                                                         | .3581                                  | .1137                                      |
| Diabetes                                              | 900 (64%)                                        | 536 (62%)                                                    | 364 (67%)                                                     | 105 (68%)                                                         | .0766                                  | .2063                                      |
| Tissue loss at baseline                               | 1046 (75%)                                       | 641 (74%)                                                    | 405 (75%)                                                     | 112 (72%)                                                         | 1.0000                                 | .5518                                      |
| Previous infrainguinal reconstruction                 | 383 (27%)                                        | 244 (28%)                                                    | 139 (26%)                                                     | 37 (24%)                                                          | .2687                                  | .2836                                      |
| Hc t <30%*                                            | 199 (14%)                                        | 106 (12%)                                                    | 93 (17%)                                                      | 26 (17%)                                                          | .0147                                  | .1524                                      |
| Total lymphocyte count < 1500 cells/mm <sup>3</sup> * | 710 (51%)                                        | 420 (49%)                                                    | 290 (53%)                                                     | 77 (50%)                                                          | .1001                                  | .8617                                      |
| Duration of surgery (h)                               | 4.2 ± 1.9                                        | 4.2 ± 1.9                                                    | 4.2 ± 1.7                                                     | 4.4 ± 1.9                                                         | .8123                                  | .3691                                      |
| Graft source not greater saphenous vein               | 273 (19%)                                        | 159 (18%)                                                    | 114 (21%)                                                     | 26 (17%)                                                          | .2680                                  | .6530                                      |
| Conduit length (mm)                                   | 49.2 ± 14.5                                      | 49.1 ± 14.1                                                  | 49.4 ± 15.1                                                   | 49.5 ± 15.1                                                       | .7825                                  | .7521                                      |
| Conduit diameter < 3 mm                               | 85 (6%)                                          | 41 (5%)                                                      | 44 (8%)                                                       | 14 (9%)                                                           | .0162                                  | .0527                                      |
| Composite vein                                        | 205 (15%)                                        | 118 (14%)                                                    | 87 (16%)                                                      | 23 (15%)                                                          | .2447                                  | .7055                                      |
| Site of distal anastomosis (tibial/pedal vessel)      | 914 (65%)                                        | 545 (63%)                                                    | 369 (68%)                                                     | 99 (64%)                                                          | .0456                                  | .8537                                      |
| Concomitant procedure                                 | 252 (18%)                                        | 147 (17%)                                                    | 105 (19%)                                                     | 19 (12%)                                                          | .2850                                  | .1567                                      |
| Postoperative oral anticoagulation                    | 376 (27%)                                        | 204 (24%)                                                    | 172 (32%)                                                     | 56 (36%)                                                          | .0013                                  | .0018                                      |

WC, Wound complications.

\*Laboratory values were obtained at baseline.
